# Supplementary material for: Electrochemical fixation of CO2 over a Mo plate to prepare a Mo2C film for electrocatalytic hydrogen evolution
Source: Royal Society of Chemistry journal article supplement (doi:10.1039/d1qm00443c), 2021-01-01
Supplement: d1qm00443c1.pdf [file d1qm00443c1.pdf]

## Electronic Supplementary Information (ESI)

### Electrochemical fixation of CO<sub>2</sub> over Mo plate to prepare Mo<sub>2</sub>C film for electrocatalytic hydrogen evolution

*Hansheng Xiao,<sup>a</sup> Hua Zhu,<sup>a</sup> Wei Weng,<sup>a</sup> Kongzhai Li,<sup>\*b</sup> Wei Li,<sup>\*c</sup> and Wei Xiao<sup>\*ad</sup>*

<sup>a</sup> School of Resource and Environmental Sciences, Hubei International Scientific and Technological Cooperation Base of Sustainable Resource and Energy, Wuhan University, Wuhan 430072, P. R. China. E-mail: [00030042@whu.edu.cn](mailto:00030042@whu.edu.cn) (W. Xiao)

<sup>b</sup> State Key Laboratory of Complex Nonferrous Metal Resources Clean Utilization Engineering, Faculty of Chemical Engineering, Kunming University of Science and Technology, Kunming 650093, P. R. China. E-mail: [kongzhai.li@foxmail.com](mailto:kongzhai.li@foxmail.com) (K. Li)

<sup>c</sup> Institute of Rare Metals, Guangdong Academy of Sciences, Guangzhou 510650, P. R. China. E-mail: [shs9320@163.com](mailto:shs9320@163.com) (W. Li)

<sup>d</sup> College of Chemistry and Molecular Sciences, Hubei Key Laboratory of Electrochemical Power Sources, Wuhan University, Wuhan 430072, P. R. China.

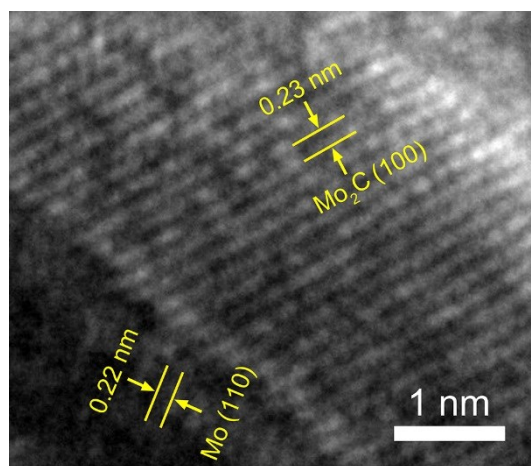

**Fig. S1** High-resolution TEM image of the Mo<sub>2</sub>C/Mo-60.

The film is extremely stable and can hardly peel off from the substrate even upon violent ultrasonication. For TEM test, powder is scratched from the substrate by a blade. The TEM image in Fig. S1 is based on the scratched powder.

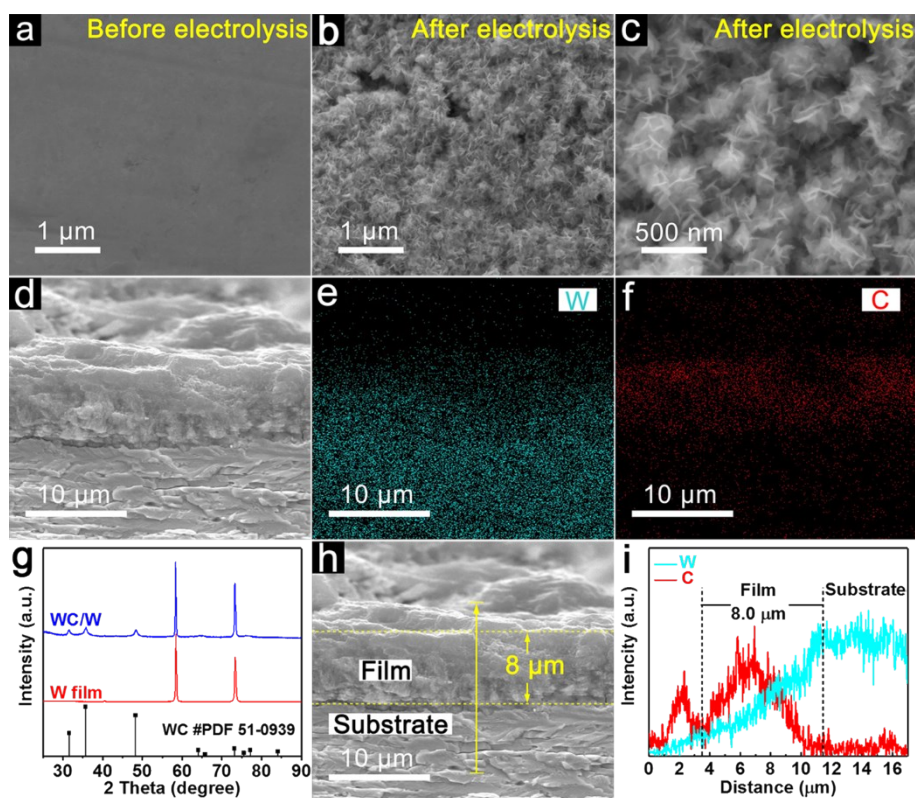

**Fig. S2** Typical SEM images of W plate (a) before electrolysis and (b-c) after electrolysis. Elemental distribution mappings (d-f) after electrolysis. (g) XRD patterns of WC/W and Mo film. Cross-sectional SEM images of W plates after electrolysis (h) and corresponding EDS results of linear sweep analysis (i). Electrolysis time: 120 min.; Cell voltage: 3.1 V.

Similar with the Mo<sub>2</sub>C-coated Mo plates, the electrochemical treatment of tungsten substrate was conducted at 3.1 V for 2 h in 900 °C molten Li<sub>2</sub>CO<sub>3</sub>. Then the W plate cathode was lifted out from the molten salt and cooled to room temperature. Finally, the tungsten carbide-coated tungsten plate (denoted as WC/W) was obtained after rinsing and drying at 60 °C.

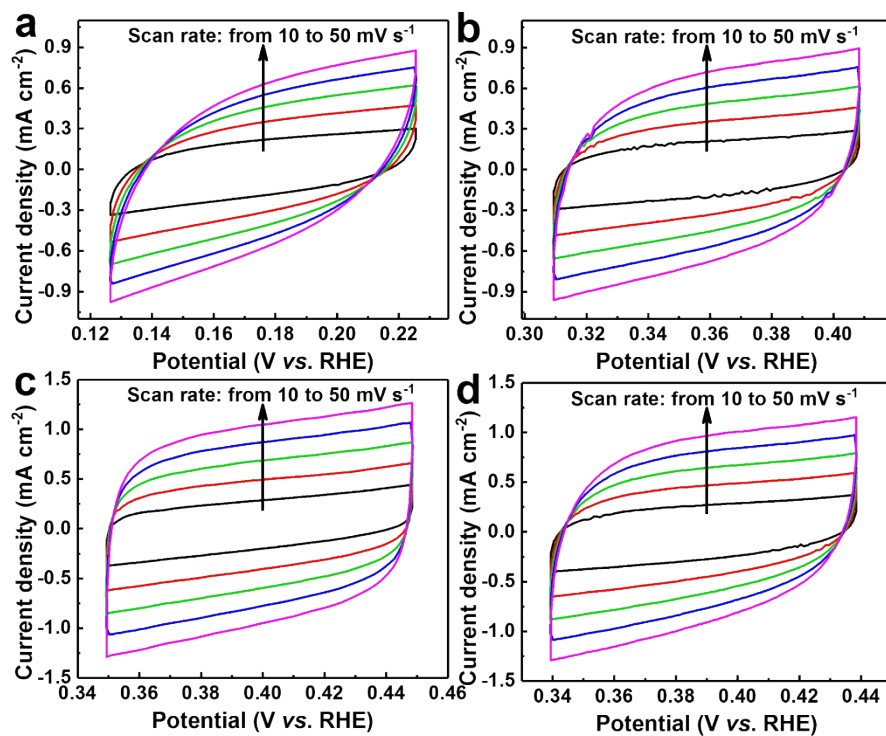

**Fig. S3** CV curves measured at different scan rates from 10 to 50  $\text{mV s}^{-1}$  in 0.5 M  $\text{H}_2\text{SO}_4$  for  $\text{Mo}_2\text{C}/\text{Mo}$  samples: (a)  $\text{Mo}_2\text{C}/\text{Mo}-10$ , (b)  $\text{Mo}_2\text{C}/\text{Mo}-30$ , (c)  $\text{Mo}_2\text{C}/\text{Mo}-60$ , and (d)  $\text{Mo}_2\text{C}/\text{Mo}-120$ .

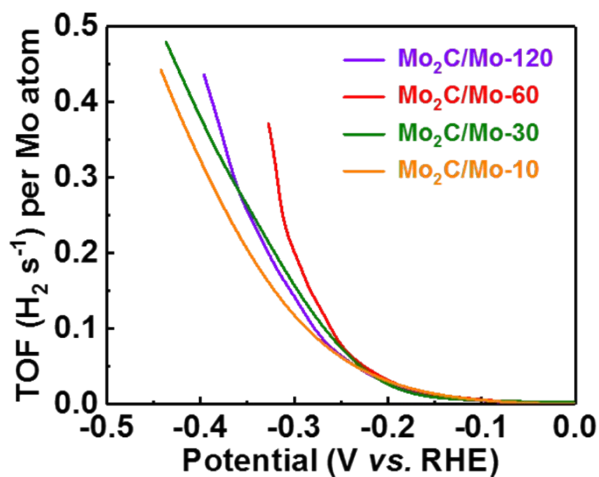

**Fig. S4** TOFs of  $\text{Mo}_2\text{C}/\text{Mo}-10$ ,  $\text{Mo}_2\text{C}/\text{Mo}-30$ ,  $\text{Mo}_2\text{C}/\text{Mo}-60$  and  $\text{Mo}_2\text{C}/\text{Mo}-120$ .

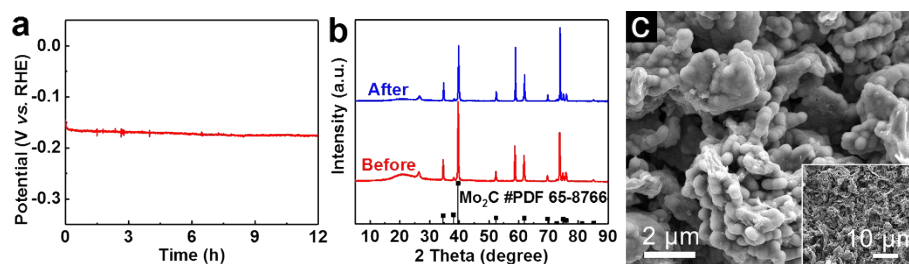

**Fig. S5** (a) Long-term HER stability test of Mo<sub>2</sub>C/Mo-60 at 10 mA cm<sup>-2</sup>. (b) XRD patterns of Mo<sub>2</sub>C/Mo-60 before and after stability test. (c) SEM image after stability test.

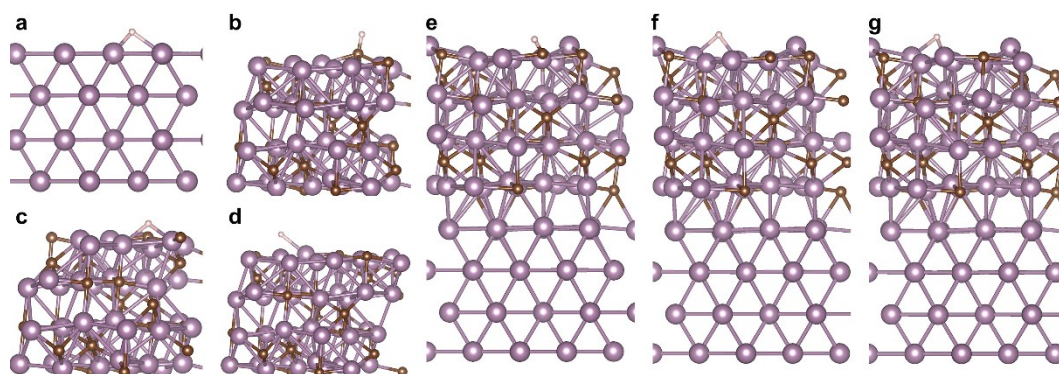

**Fig. S6** Optimized geometry structures of hydrogen adsorption on (a) the surface Mo site of Mo (110), the surface (b) C, (c) Mo1 and (d) Mo2 sites of Mo<sub>2</sub>C (121) and (e) C, (f) Mo1 and (g) Mo2 sites of Mo (110)-Mo<sub>2</sub>C (121).

**Table S1** The electrochemical properties of all the tested samples

| Samples              | Overpotential (mV) @10 mA cm <sup>-2</sup> | Tafel slope (mV dec <sup>-1</sup> ) | R <sub>s</sub> (Ω) | R <sub>ct</sub> (Ω) |
|----------------------|--------------------------------------------|-------------------------------------|--------------------|---------------------|
| Pt/C                 | 25                                         | 45.3                                | 2.20               | 9.9                 |
| Mo film              | 375                                        | 321.6                               | 1.78               | 177.7               |
| Mo <sub>2</sub> C/Mo | 149                                        | 77.9                                | 2.15               | 23.8                |

**Table S2** Comparison of Mo<sub>2</sub>C-based catalysts for HER performance in 0.5 M H<sub>2</sub>SO<sub>4</sub>

| Catalyst                                | Overpotential (mV) @10 mA cm <sup>-2</sup> | Tafel slope (mV dec <sup>-1</sup> ) | Preparation method  | Reference |
|-----------------------------------------|--------------------------------------------|-------------------------------------|---------------------|-----------|
| Mo <sub>2</sub> C/Mo                    | 149                                        | 77.9                                | molten salt         | This work |
| Ni-Mo <sub>2</sub> C <sub>CB</sub> /CFP | 121.4                                      | 116.9                               | molten salt         | 1         |
| Mo <sub>2</sub> C/RGO                   | 130                                        | 57.3                                | hydrothermal        | 2         |
| Mo <sub>2</sub> C/CC                    | 140                                        | 124                                 | hydrothermal        | 3         |
| Mo <sub>2</sub> C/NC                    | 140                                        | 116                                 | hydrothermal        | 4         |
| L-Mo <sub>2</sub> C                     | 170                                        | 77                                  | molten salt         | 5         |
| Mo <sub>2</sub> C-G                     | 150                                        | 55                                  | hydrothermal        | 6         |
| H-Mo <sub>2</sub> C/C                   | 160                                        | 66                                  | electrospinning     | 7         |
| MoS <sub>2</sub> /CS <sub>2</sub>       | 208                                        | 43                                  | Colloidal synthesis | 8         |
| MoS <sub>2</sub> @FePS <sub>3</sub>     | 168                                        | 127                                 | hydrothermal        | 9         |

**Supplementary references**

1. Z. Hu, J. Huang, Y. Luo, M. Liu, X. Li, M. Yan, Z. Ye, Z. Chen, Z. Feng and S. Huang, Wrinkled Ni-doped Mo<sub>2</sub>C coating on carbon fiber paper: An advanced

- electrocatalyst prepared by molten-salt method for hydrogen evolution reaction, *Electrochim. Acta*, 2019, **319**, 293-301.
2. L. F. Pan, Y. H. Li, S. Yang, P. F. Liu, M. Q. Yu and H. G. Yang, Molybdenum carbide stabilized on graphene with high electrocatalytic activity for hydrogen evolution reaction, *Chem. Commun.*, 2014, **50**, 13135-13137.
  3. M. Fan, H. Chen, Y. Wu, L.L. Feng, Y. Liu, G.-D. Li and X. Zou, Growth of molybdenum carbide micro-islands on carbon cloth toward binder-free cathodes for efficient hydrogen evolution reaction, *J. Mater. Chem. A*, 2015, **3**, 16320-16326.
  4. M. Fan, Y. Zheng, A. Li, Y. Ma, Q. Huo, Z.A. Qiao and S. Dai, Sprout-like growth of mesoporous Mo<sub>2</sub>C/NC nanonetworks as efficient electrocatalysts for hydrogen evolution, *Chemcatchem*, 2018, **10**, 625-631.
  5. W. Yuan, Q. Huang, X. Yang, Z. Cui, S. Zhu, Z. Li, S. Du, N. Qiu and Y. Liang, Two-dimensional lamellar Mo<sub>2</sub>C for electrochemical hydrogen production: Insights into the origin of hydrogen evolution reaction activity in acidic and alkaline electrolytes, *ACS Appl. Mater. Interfaces*, 2018, **10**, 40500-40508.
  6. C. He and J. Tao, Exploration of the electrochemical mechanism of ultrasmall multiple phases molybdenum carbides nanocrystals for hydrogen evolution reaction, *RSC Adv.*, 2016, **6**, 9240-9246.
  7. X. Liu, L. Zhang, X. Lan and X. Hu, Paragenesis of Mo<sub>2</sub>C nanocrystals in mesoporous carbon nanofibers for electrocatalytic hydrogen evolution, *Electrochim. Acta*, 2018, **274**, 23-30.
  8. C. Meerbach, B. Klemmed, D. Spittel, C. Bauer, Y. J. Park, R. Hubner, H. Y. Jeong, D. Erb, H. S. Shin, V. Lesnyak and A. Eychmuller, General colloidal synthesis of transition-metal disulfide nanomaterials as electrocatalysts for hydrogen evolution reaction, *ACS Appl. Mater. Interfaces*, 2020, **12**, 13148-13155.
  9. H. Huang, J. Song, D. Yu, Y. Hao, Y. Wang and S. Peng, Few-layer FePS<sub>3</sub> decorated with thin MoS<sub>2</sub> nanosheets for efficient hydrogen evolution reaction in alkaline and acidic media, *Appl. Surf. Sci.*, 2020, **525**, 146623.
